# Supplementary material for: Long noncoding RNA LINC00305 promotes inflammation by activating the AHRR-NF-κB pathway in human monocytes
Source: PubMed Central journal article supplement (PMC5385552; doi:10.1038/srep46204), 2017-04-10
Supplement: srep46204-s1.pdf [file srep46204-s1.pdf]

***Long noncoding RNA LINC00305 promotes inflammation by activating the AHRR-NF- $\kappa$ B pathway in human monocytes***

Dan-Dan Zhang<sup>1#</sup>, Wen-Tian Wang<sup>1#</sup>, Jian Xiong<sup>1#</sup>, Xue-Min Xie<sup>1</sup>, Shen-Shen Cui<sup>1</sup>, Zhi-Guo Zhao<sup>1</sup>, Mulin Jun Li<sup>3,4</sup>, Zhu-Qin Zhang<sup>1</sup>, De-Long Hao<sup>1</sup>, Xiang Zhao<sup>1</sup>, Yong-Jun Li<sup>6</sup>, Junwen Wang<sup>3,4,5</sup>, Hou-Zao Chen<sup>1</sup>, Xiang Lv<sup>1,2\*</sup>, De-Pei Liu<sup>1\*</sup>

<sup>1</sup>State Key Laboratory of Medical Molecular Biology, Department of Biochemistry and Molecular Biology, <sup>2</sup>Department of Pathophysiology, Institute of Basic Medical Sciences, Chinese Academy of Medical Sciences & Peking Union Medical College, Beijing, 100005, P. R. China;

<sup>3</sup>Department of Biochemistry, <sup>4</sup>Centre for Genomic Sciences, LKS Faculty of Medicine, The University of Hong Kong, Hong Kong SAR, P. R. China;

<sup>5</sup>Center for Individualized Medicine, Mayo Clinic Arizona & Department of Biomedical Informatics, Arizona State University, Scottsdale, AZ, 85259, USA.

<sup>6</sup>Department of Vascular Surgery, Beijing Hospital, Beijing 100005, P. R. China

# These authors contributed equally to the work

\***Corresponding authors:** De-Pei Liu, Tel.: (8610) 69156415, Fax: (8610) 65105093, E-mail:

[liudp@pumc.edu.cn](mailto:liudp@pumc.edu.cn); Xiang Lv, Tel.: (8610) 69156415, Fax: (8610) 65105093, E-mail:

[lvxiang@pumc.edu.cn](mailto:lvxiang@pumc.edu.cn)

**Supplementary Table 1. The primers used for vector construction.**

|                  |         |                                    |
|------------------|---------|------------------------------------|
| <i>Linc00305</i> | forward | CCGGAATTCAATGATGGACTCTGATTCCAC     |
|                  | reverse | GCTCTAGAAAAGTTAAACAAATGTTTAATAGGA  |
| <i>LIMR</i>      | forward | GAATTCGCCACCATGGAAGCACCTGACTACG    |
|                  | reverse | TCTAGATCACTGGTGTGGGTCTT            |
| <i>AHRR</i>      | forward | CCGGAATTCGCCACCATGCCGAGGACGATGATCC |
|                  | reverse | TGCTCTAGACTATGGCAGGAATGTGCACC      |

**Supplementary Table 2. The primers used in RT-qPCR and RIP assays.**

|                               |         |                           |
|-------------------------------|---------|---------------------------|
| <i>Linc00305</i>              | forward | TCAGCAGCCTTCTGGTTTATCA    |
|                               | reverse | TCCTTGCTTCCTCAGGTCTCT     |
| <i>GAPDH</i>                  | forward | CATGAGAAGTATGACAACAGCCT   |
|                               | reverse | AGTCCTTCCACGATACCAAAGT    |
| <i>ACTB</i>                   | forward | CACCCAGCACAATGAAGATC      |
|                               | reverse | GTCATAGTCCGCCTAGAAGC      |
| <i>IL1<math>\alpha</math></i> | forward | GGTTGAGTTTAAGCCAATCCATC   |
|                               | reverse | CACATTGCTCAGGAAGCTAAAAG   |
| <i>IL1<math>\beta</math></i>  | forward | GGGACAGGATATGGAGCAACA     |
|                               | reverse | TATCATCTTTCAACACGCAGGAC   |
| <i>IL6</i>                    | forward | ACTCACCTCTTCAGAACGAATTG   |
|                               | reverse | CCATCTTTGGAAGGTTTCAGGTTG  |
| <i>IL8</i>                    | forward | ACTGAGAGTGATTGAGAGTGGAC   |
|                               | reverse | AACCCTCTGCACCCAGTTTTTC    |
| <i>IL18</i>                   | forward | TCTTCATTGACCAAGGAAATCGG   |
|                               | reverse | TCCGGGGTGCATTATCTCTAC     |
| <i>TNF<math>\alpha</math></i> | forward | CCTCTCTCTAATCAGCCCTCTG    |
|                               | reverse | GAGGACCTGGGAGTAGATGAG     |
| <i>MMP9</i>                   | forward | CTGGGCAGATTCCAAACCTT      |
|                               | reverse | CGGCAAGTCTTCCGAGTAGTT     |
| <i>CD14</i>                   | forward | TGAGCTGGACGATGAAGATTTC    |
|                               | reverse | ACGCGCTTTAGAAACGGCT       |
| <i>Calponin</i>               | forward | GTCAACCCAAAATTGGCACCA     |
|                               | reverse | ACCTTGTTTCCTTTCGTCTTCG    |
| <i>SM-MHC</i>                 | forward | CATCTACTCGGAGAAGATCGTTCG  |
|                               | reverse | CGCCTGTGCATAGAATGGACT     |
| <i>Smoothelin</i>             | forward | GGGATCGTGTCCACAAGTTCA     |
|                               | reverse | GCTACTCCTCGTTGCTCCTT      |
| <i>SERPINB2</i>               | forward | TTAATTCCTGGGTCAAGACTCAAAC |
|                               | reverse | AGTAGACAGCATTACCAGGACC    |
| <i>SERPINB4</i>               | forward | CAGCATTAGGGATGGTCCCTCTTA  |

|                 |         |                           |
|-----------------|---------|---------------------------|
|                 | reverse | TGCAGCTTTTTCTGTGGTGTTT    |
| <i>SERPIN8</i>  | forward | AATGACTGGGTGTCGGAAAAAA    |
|                 | reverse | AACTGAGCCTTCCACTTCCCTT    |
| <i>SERPIN10</i> | forward | GCCAATGCGATATATGGAGAGA    |
|                 | reverse | CCACAAAGTTAACAGGCTGAGG    |
| <i>VPS4B</i>    | forward | CCTCTGATCTTGTCTTAAGTGGCT  |
|                 | reverse | CATCAATGAAGATAATGGAGGGCT  |
| <i>KDSR</i>     | forward | TCTATTAATGACAAACAGGTGGTGC |
|                 | reverse | ACCCAGTTTCTCCTGTGCTTGT    |
| <i>Bcl2</i>     | forward | GGTGGGGTCATGTGTGTGG       |
|                 | reverse | CGGTTTCAGGTAATCAGTCATCC   |

**Supplementary Table 3. Antibodies used in western blot, ChIP, RIP, IP and immunostaining assays.**

| Protein                    | Producer                  | Catalog number | Origin |
|----------------------------|---------------------------|----------------|--------|
| IKK $\beta$                | Abcam                     | 32135          | Rabbit |
| phosphorylated IKK $\beta$ | Abcam                     | 59195          | Rabbit |
| P65                        | Abcam                     | 7970           | Rabbit |
| phosphorylated P65         | Abcam                     | 86299          | Rabbit |
| P50                        | Abcam                     | 7971           | Rabbit |
| LIMR                       | Abcam                     | 103458         | Rabbit |
| AHRR                       | Abcam                     | 108518         | Rabbit |
| AHR                        | Abcam                     | 153744         | Rabbit |
| His                        | Cell Signaling Technology | 12698          | Rabbit |
| HA                         | Abcam                     | 9110           | Rabbit |
| GAPDH                      | Cell Signaling Technology | 5174           | Mouse  |
| IgG                        | Santa Cruz Biotechnology  | sc-2027        | Rabbit |

**Supplementary Table 4. Primers used in ChIP assay.**

|                                         |         |                           |
|-----------------------------------------|---------|---------------------------|
| <i>IL1<math>\alpha</math></i> promoters | forward | TACTGAATGATAGCACGTTTGAGG  |
|                                         | reverse | AGTCTCTTATCACCACCAACACCA  |
| <i>IL1<math>\beta</math></i> promoters  | forward | GTGTGTCTTCCACTTTGTCCCA    |
|                                         | reverse | AATCGTTGTGCAGTTGATGTCC    |
| <i>IL6</i> promoters                    | forward | AACTTCGTGCATGACTTCAGCTT   |
|                                         | reverse | AGCAGAACCACTCTTCCTTTACTTT |
| <i>IL8</i> promoters                    | forward | ATCTTGTTCTAACACCTGCCACTC  |
|                                         | reverse | CTCCACAATTTGGTGAATTATCAA  |
| <i>IL18</i> promoters                   | forward | GGGGAAGTCTGAATGAGGTTAT    |
|                                         | reverse | CCTGGTCACACTTCAGCACAA     |
| <i>TNF<math>\alpha</math></i> promoters | forward | CATTATGAGTCTCCGGGTCAGA    |

|  |         |                     |
|--|---------|---------------------|
|  | reverse | GGCTTGAGGCCTCAGGAAA |
|--|---------|---------------------|

**Supplementary Table 5. General information of the enrolled atherosclerosis patients (AS, N=17) and normal controls (N=9) who provide the atherosclerotic plaques or artery samples for the RT-PCR analysis of *LINC00305* expression in Figure 2A.**

| Gender | Age | Diagnosis |
|--------|-----|-----------|
| Male   | 87  | Normal    |
| Male   | 61  | Normal    |
| Male   | 73  | Normal    |
| Male   | 22  | Normal    |
| Male   | 47  | Normal    |
| Male   | 57  | Normal    |
| Male   | 64  | Normal    |
| Female | 71  | Normal    |
| Female | 73  | Normal    |
| Male   | 57  | AS        |
| Male   | 64  | AS        |
| Male   | 59  | AS        |
| Male   | 53  | AS        |
| Male   | 54  | AS        |
| Male   | 71  | AS        |
| Female | 74  | AS        |
| Female | 74  | AS        |
| Female | 73  | AS        |
| Male   | 62  | AS        |
| Male   | 59  | AS        |
| Male   | 60  | AS        |
| Male   | 59  | AS        |
| Male   | 64  | AS        |
| Male   | 51  | AS        |
| Male   | 56  | AS        |
| Male   | 61  | AS        |

**Supplementary Table 6. General information of the atherosclerosis patients and normal controls who provide blood samples for the RT-PCR analysis of *LINC00305* expression in the peripheral blood mononuclear cells (PBMC) (AS, N=7; normal control, N=9) or in the magnetically enriched CD14<sup>+</sup> monocytes (normal, N=5) in Figure 2B-C.**

| Gender | Age | Diagnosis |
|--------|-----|-----------|
| Male   | 68  | AS        |

|             |    |        |
|-------------|----|--------|
| Male        | 60 | AS     |
| Male        | 40 | AS     |
| Male        | 37 | AS     |
| Male        | 62 | AS     |
| Male        | 71 | AS     |
| Male        | 54 | AS     |
| Male        | 35 | Normal |
| Male        | 58 | Normal |
| Male        | 37 | Normal |
| Male        | 31 | Normal |
| Male        | 32 | Normal |
| Male        | 62 | Normal |
| Male        | 36 | Normal |
| Male        | 33 | Normal |
| Male        | 62 | Normal |
| Male (CD14) | 37 | Normal |
| Male (CD14) | 42 | Normal |
| Male (CD14) | 46 | Normal |
| Male (CD14) | 53 | Normal |
| Male (CD14) | 53 | Normal |

**Figure S1**

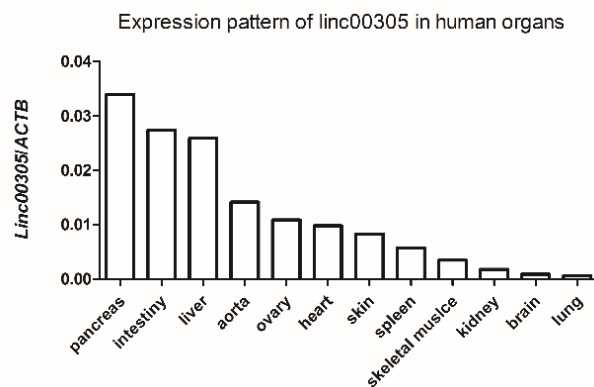

**Supplementary Figure 1. The expression of *LINC00305* in different human organs.** Quantitative RT-PCR analysis of *LINC00305* in various human organs showed lower expression compare to that in the atherosclerotic plaques (Fig. 2A). The relative mRNA expression levels of mRNA were normalized to the *ACTB* internal control.

Figure S2

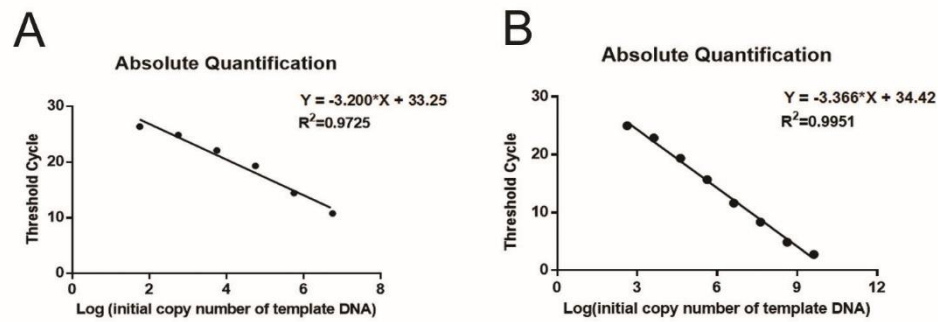

Supplementary Figure 2. Standard curves for the Real-Time RT-PCR quantification of (A) human *GAPDH* and (B) human *LINC00305* expression.

Figure S3

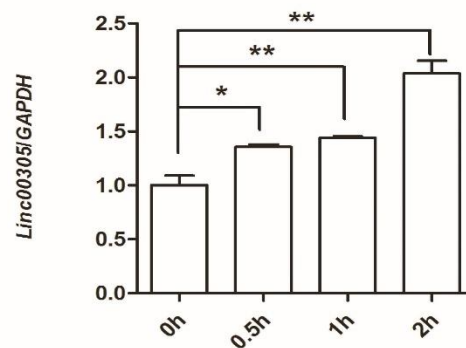

Supplementary Figure 3. *LINC00305* is upregulated in LPS-stimulated THP-1 cells. *LINC00305* expression in THP-1 cells stimulated with 0.1 µg/ml LPS for the indicated periods of time was detected by real-time RT-PCR. *GAPDH* is used as the internal control, and the level of *LINC00305* expression in unstimulated THP-1 cells was set as “1”. \* $p < 0.05$ , \*\* $p < 0.01$  vs. the indicated group.

**Figure S4**

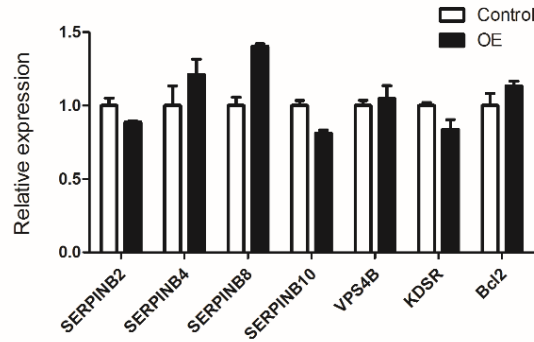

**Supplementary Figure 4. Overexpression of *LINC00305* does not significantly affect the transcription of neighboring genes.** QRT-PCR analysis of genes adjacent to the *LINC00305* locus in THP-1 cells stably expressing *LINC00305* (OE) or the control vector (Control) (Refs to Fig.3A upper panel for the degree of overexpression). Some neighboring genes are undetectable in the cells and are not shown here. Gene expression levels in the control group were designated a value of 1.0, and *GAPDH* was used as an internal control. Data are presented as the mean  $\pm$  sem of 3 independent experiments.

**Figure. S5**

**A**

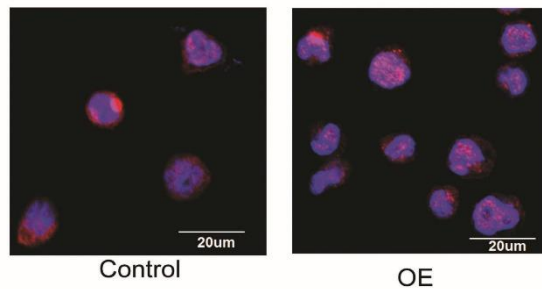

**B**

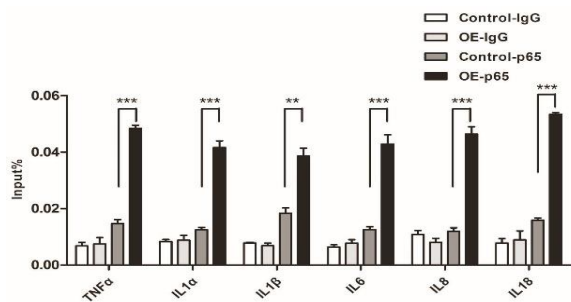

**Supplementary Figure 5. *LINC00305* promotes inflammation by activating NF- $\kappa$ B in THP-1 cells.**

**(A)** Representative images of immunofluorescence assays evaluating p65 localization in THP-1 cells stably expressing *LINC00305* (OE) or the control vector (Control). **(B)** Chromatin immunoprecipitation (ChIP) assays evaluating p65 binding to the promoters of the indicated cytokine genes in THP-1 cells stably expressing *LINC00305* (OE) or the control vector (Control). Data are presented as the mean  $\pm$  sem of 3 replicate experiments. \*\* $p < 0.01$ , \*\*\* $p < 0.001$  vs. the indicated group.

Figure. S6

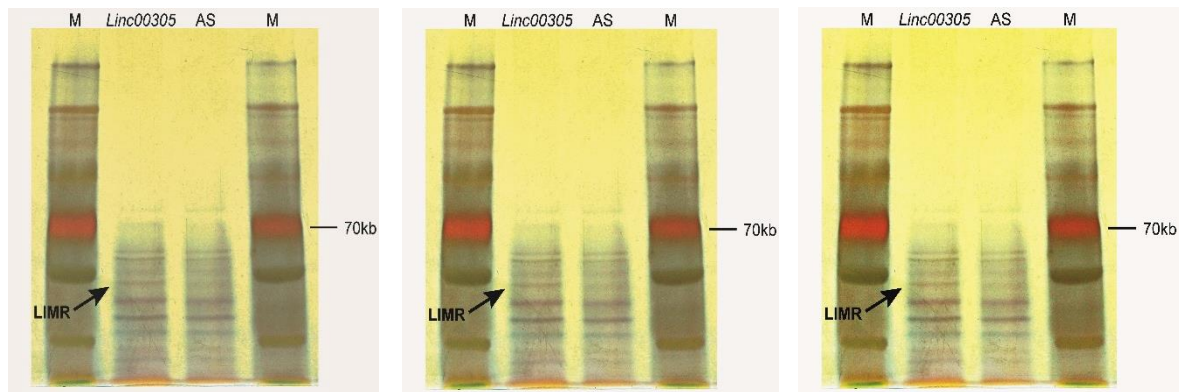

Supplementary Figure 6. Different levels of exposure of the silver staining in Figure 5A. Increased level of contrast is used from the left to the right.

Figure. S7

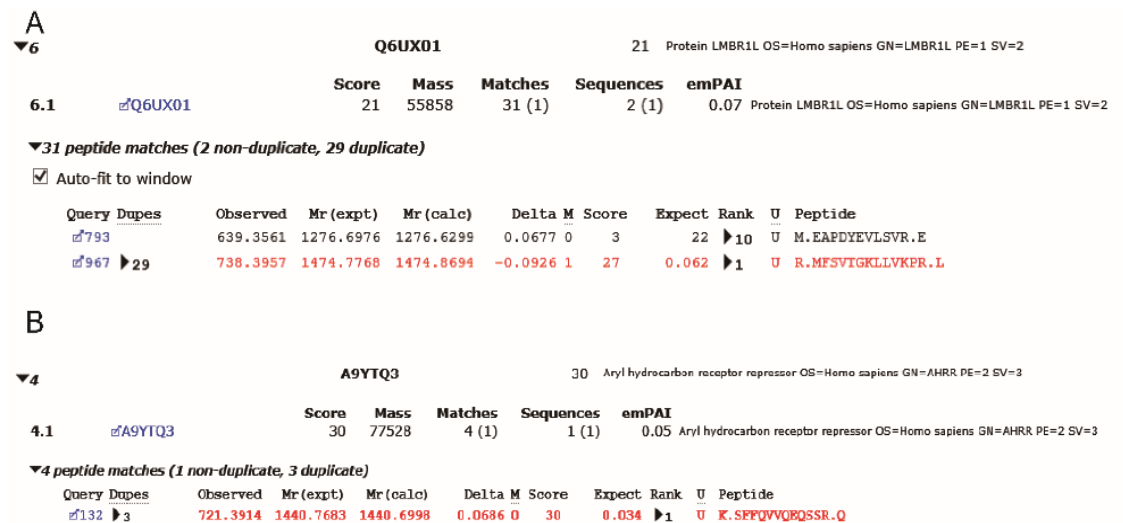

Supplementary Figure 7. Mass spectrometry analysis of (A) the *LINC00305*-specific binding protein captured by a RNA pull-down assay in THP-1 cells and (B) the LIMR-interacting protein captured by a GST pull-down assay in THP-1 cells.



**Figure. S8**

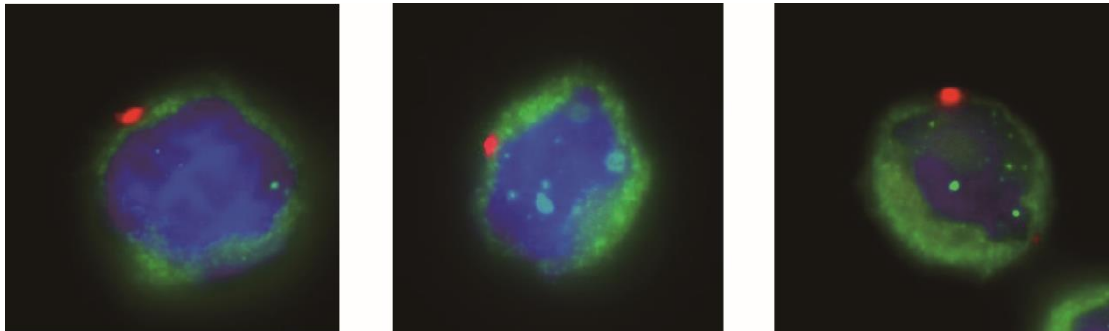

**Supplementary Figure 8. *LINC00305* and LIMR co-localize in THP-1 cells.** Representative images of THP-1 cells demonstrating the overlap of the *LINC00305* RNA-FISH signal (red) and the LIMR signal (green). DAPI staining of the cell nucleus is indicated in blue.

**Figure. S9**

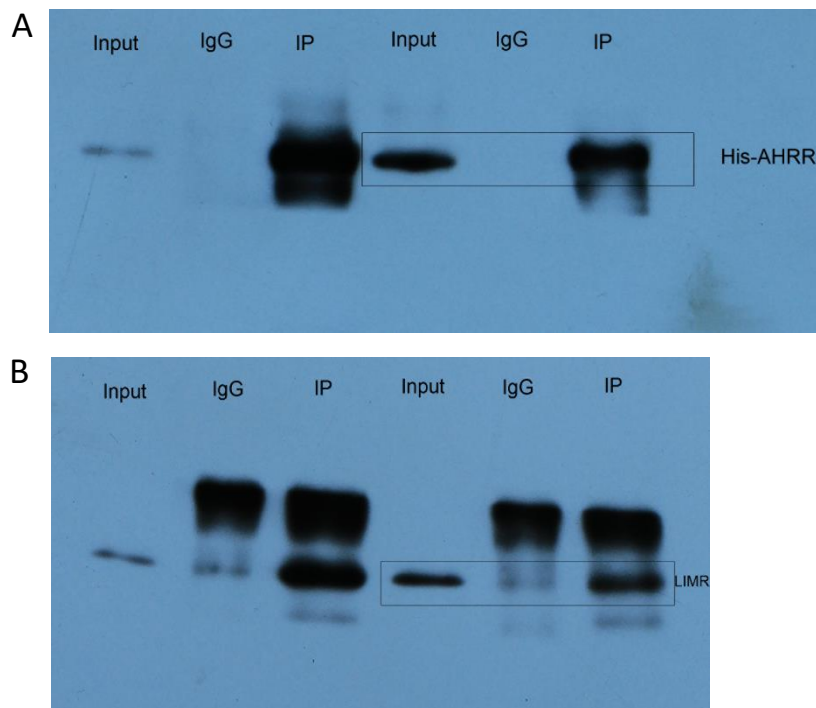

**Supplementary Figure 9. The full-length blots to the co-IP analysis shown in Figure 5D.** (A) Analysis with anti-His antibody. (B) Analysis with anti-LIMR antibody. For each antibody, two replicates of Input sample and the precipitated proteins were loaded. Rectangles indicate the cropped regions shown in Figure 5D.

**Figure. S10**

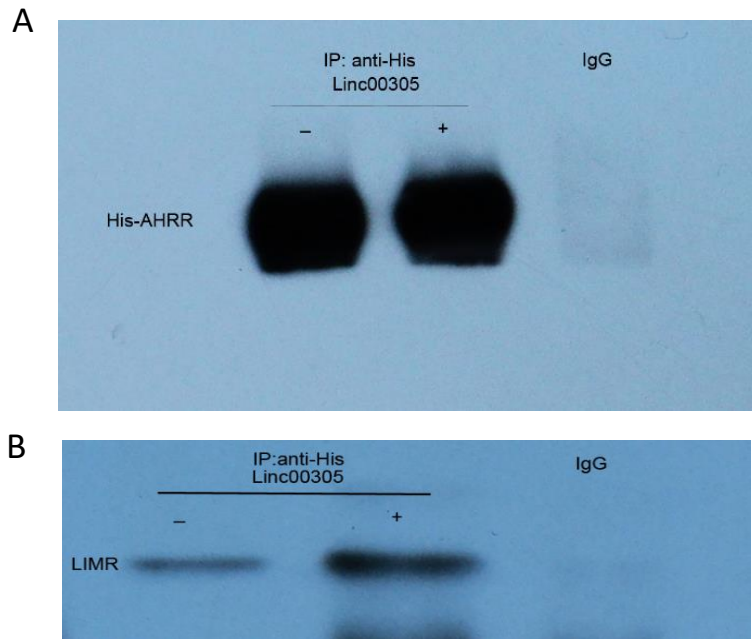

**Supplementary Figure 10. The full-length blots to the co-IP analysis shown in Figure 5E. (A) Analysis with anti-His antibody. (B) Analysis with anti-LIMR antibody.**
